# Supplementary material for: A Cross Modal Performance-Based Measure of Sensory Stimuli Intricacy
Source: PubMed Central journal article supplement (PMC4740424; doi:10.1371/journal.pone.0147449), 2016-02-03
Supplement: pone.0147449.s001.pdf [file pone.0147449.s001.pdf]

# A cross modal performance-based measure of sensory stimuli intricacy

Kobi Snitz<sup>1\*,</sup>, Anat Arzi<sup>1,</sup>, Merav Jacobson<sup>1,</sup>, Lavi Secundo<sup>1,</sup>, Kineret Weissler<sup>1,</sup>,  
Adi Yablonka<sup>1,</sup>

**1 Dept of Neurobiology, Weizmann Institute of Science, Rehovot, Israel**

**These authors contributed equally to this work.**

\* [kobi.snitz@weizmann.ac.il](mailto:kobi.snitz@weizmann.ac.il)

## 0.1 S1 Table

**Data set A odorants.**

| Name                                    | CAS number | mean variance |
|-----------------------------------------|------------|---------------|
| Isoamyl acetate                         | 123-92-2   | 0.8119        |
| Nonane                                  | 111-84-2   | 0.5398        |
| Ethyl valerate                          | 539-82-2   | 0.9723        |
| 5-methyl-2-hexanone                     | 110-12-3   | 1.3859        |
| Isopropylbenzene (Cumene)               | 98-82-8    | 0.7061        |
| 1-pentanol                              | 71-41-0    | 0.6954        |
| 1,7-octadiene                           | 3710-30-3  | 0.8330        |
| 2-heptanone                             | 110-43-0   | 0.6895        |
| 4-methyl-3-penten-2-one (mesityl oxide) | 141-79-7   | 0.8428        |
| 3-methyl-2-buten-1-ol                   | 556-82-1   | 0.5233        |
