# Supplementary material for: A Cross Modal Performance-Based Measure of Sensory Stimuli Intricacy
Source: PubMed Central journal article supplement (PMC4740424; doi:10.1371/journal.pone.0147449), 2016-02-03
Supplement: pone.0147449.s002.pdf [file pone.0147449.s002.pdf]

# A cross modal performance-based measure of sensory stimuli intricacy

Kobi Snitz<sup>1\*,</sup>, Anat Arzi<sup>1,</sup>, Merav Jacobson<sup>1,</sup>, Lavi Secundo<sup>1,</sup>, Kineret Weissler<sup>1,</sup>,  
Adi Yablonka<sup>1,</sup>

**1 Dept of Neurobiology, Weizmann Institute of Science, Rehovot, Israel**

**These authors contributed equally to this work.**

\* [kobi.snitz@weizmann.ac.il](mailto:kobi.snitz@weizmann.ac.il)

## 0.1 S2 Table

**Data set C (and B) odorants** The mean familiarity is calculated for the raw data (no normalizing) and the variance is calculated from the twice z-scored data as usual. The Spearman correlation between the variance and familiarity is  $r=0.0909$   $p=0.8114$ .

| Name                             | Dravnieks Number | ordered by increasing data set C variance | ordered by increasing familiarity | Data set B variance |
|----------------------------------|------------------|-------------------------------------------|-----------------------------------|---------------------|
| Isoamyl acetate                  | 9                | 7 (0.7229)                                | 4 (36.91)                         | 0.6986              |
| Dibutyl Amine                    | 49               | 6 (0.6974)                                | 10 (53.051)                       | 1.0739              |
| Rthyl Pyrazine: 2-Ethyl Pyrazine | 61               | 9 (0.8225)                                | 6 (40.3966)                       | 0.9042              |
| Eucalyptol                       | 63               | 4 (0.6670)                                | 1 (23.25)                         | 0.6262              |
| Hexanol: 1-Hexanol               | 75               | 10 (0.8230)                               | 8 (50.95)                         | 0.9697              |
| Methyl Anthranilate              | 96               | 2 (0.6716)                                | 2 (33.69)                         | 0.8975              |
| Valeric Acid Pentatonic Acid     | 111              | 1 (0.6138)                                | 7 (49.30)                         | 0.5739              |
| Tolualdehyde: ortho-Tolualdehyde | 134              | 8 (0.7366)                                | 5 (37.55)                         | 0.7975              |
| Valeric Acid: iso Valeric Acid   | 141              | 2 (0.6533)                                | 9 (53.050)                        | 0.6564              |
| Vanillin                         | 143              | 3 (0.6554)                                | 3 (34.05)                         | 0.7311              |
