# Supplementary material for: A Cross Modal Performance-Based Measure of Sensory Stimuli Intricacy
Source: PubMed Central journal article supplement (PMC4740424; doi:10.1371/journal.pone.0147449), 2016-02-03
Supplement: pone.0147449.s008.pdf [file pone.0147449.s008.pdf]

# A cross modal performance-based measure of sensory stimuli intricacy

Kobi Snitz<sup>1\*,</sup>, Anat Arzi<sup>1,</sup>, Merav Jacobson<sup>1,</sup>, Lavi Secundo<sup>1,</sup>, Kineret Weissler<sup>1,</sup>,  
Adi Yablonka<sup>1,</sup>

1 Dept of Neurobiology, Weizmann Institute of Science, Rehovot, Israel

<sup>\*</sup>These authors contributed equally to this work.

\* kobi.snitz@weizmann.ac.il

## 0.1 S3 Table

**Data set D textures** the mean familiarity is calculated for the raw data (no normalizing) and the variance is calculated from the twice z-scored data as usual. The Spearman correlation between the variance and familiarity is  $r=-0.1536$   $p=0.5844$

| Texture figure | variance | familiarity |
|----------------|----------|-------------|
| (a)            | 0.5544   | 52.58       |
| (b)            | 0.5789   | 84.20       |
| (c)            | 0.6082   | 57.70       |
| (d)            | 0.6641   | 48.52       |
| (e)            | 0.6858   | 57.14       |
| (f)            | 0.7167   | 46.50       |
| (g)            | 0.7269   | 78.73       |
| (h)            | 0.7632   | 44.20       |
| (i)            | 0.7960   | 38.50       |
| (j)            | 0.8120   | 55.97       |
| (k)            | 0.8124   | 46.44       |
| (l)            | 0.8796   | 47.29       |
| (m)            | 0.8868   | 66.79       |
| (n)            | 0.8891   | 64.32       |
| (o)            | 0.9050   | 51.26       |
