# Supplementary material for: A Cross Modal Performance-Based Measure of Sensory Stimuli Intricacy
Source: PubMed Central journal article supplement (PMC4740424; doi:10.1371/journal.pone.0147449), 2016-02-03
Supplement: pone.0147449.s009.pdf [file pone.0147449.s009.pdf]

# A cross modal performance-based measure of sensory stimuli intricacy

Kobi Snitz<sup>1\*,</sup>, Anat Arzi<sup>1,</sup>, Merav Jacobson<sup>1,</sup>, Lavi Secundo<sup>1,</sup>, Kineret Weissler<sup>1,</sup>, Adi Yablonka<sup>1,</sup>

1 Dept of Neurobiology, Weizmann Institute of Science, Rehovot, Israel

<sup>\*</sup>These authors contributed equally to this work.

\* kobi.snitz@weizmann.ac.il

## 0.1 S4 Table

**Data sets A B and C odorants description** Cas numbers, chemical name and odorant descriptors which are collected from thegoodscentscompany.com [?] and the Atlas of odor character profiles [?].

| Name                                    | Dravnieks Number | Cas number | Good Scents descriptors                                                                                          | Dravnieks Descriptors                                     |
|-----------------------------------------|------------------|------------|------------------------------------------------------------------------------------------------------------------|-----------------------------------------------------------|
| Isoamyl acetate                         | 9                | 123-92-2   | Sweet, banana, fruity with a ripe estery nuance Mosciano                                                         | Sweet Fruity (other than citrus) Banana Fragrant Aromatic |
| Nonane                                  | NA               | 111-84-2   | gasoline                                                                                                         | NA                                                        |
| Ethyl valerate                          | NA               | 539-82-2   | sweet fruity apple pineapple green tropical acidic apple berry                                                   | NA                                                        |
| 5-methyl-2-hexanone                     | NA               | 110-12-3   | NA                                                                                                               | NA                                                        |
| Isopropylbenzene (Cumene)               | NA               | 98-82-8    | NA                                                                                                               | NA                                                        |
| 1-pentanol                              |                  | 71-41-0    | fusel oil sweet balsam Pungent, fermented, bready, yeasty, winey solvent-like                                    | NA                                                        |
| 1,7-octadiene                           | NA               | 3710-30-3  | NA                                                                                                               | NA                                                        |
| 2-heptanone                             | NA               | 110-43-0   | fruity spicy sweet herbal coconut woody Cheese ketonic, green banana, with a creamy nuance                       | NA                                                        |
| 4-methyl-3-penten-2-one (mesityl oxide) | NA               | 141-79-7   | pungent earthy vegetable acrylic musty, mildew, chemical, cardboard like with nutty, chocolate and woody nuances | NA                                                        |

|                                     |     |            |                                                                                                                           |                                                                       |
|-------------------------------------|-----|------------|---------------------------------------------------------------------------------------------------------------------------|-----------------------------------------------------------------------|
| 3-methyl-2-buten-1-ol               |     | 556-82-1   | fruity green lavender<br>Sweet, fruity, alcoholic                                                                         |                                                                       |
| Dibutyl Amine                       | 49  | 111-92-2   | NA                                                                                                                        | Woody resinous Light<br>Musty earthy Fragrant<br>Aromatic             |
| Rthyl Pyrazine:<br>2-Ethyl Pyrazine | 61  | 13925-00-3 | Nutty, musty, fermented, coffee, roasted, cocoa and meaty nuances woody peanut butter                                     | 'Peanut butter' 'Nutty'<br>'Woody resinous'<br>'Musty earthy' 'Heavy' |
| Eucalyptol                          | 63  | 470-82-6   | eucalyptus herbal camphor                                                                                                 | Camphor Medicinal Eucalyptus Cool cooling<br>Turpentine (pine oil)    |
| Hexanol: 1-Hexanol                  | 75  | 111-27-3   | ethereal fusel oil fruity alcoholic sweet green Pungent                                                                   | Aromatic Fragrant<br>Woody resinous Heavy<br>Chemical                 |
| Methyl Anthranilate                 | 96  | 134-20-3   | fruity grape orange-flower neroli concord grape, musty with a floral powdery nuance                                       | Burnt candle Fragrant<br>Sweet Fruity other than citrus Aromatic      |
| Valeric Acid Pentatonic Acid        | 111 | 109-52-4   | sickening putrid acidic sweaty rancid Acidic and sharp cheese-like sour milky tobacco with fruity nuances                 | Sickening Putrid foul<br>Rancid Sweaty Fecal (like manure)            |
| Tolualdehyde: ortho-Tolualdehyde    | 134 | 529-20-4   | cherry                                                                                                                    | Almond Aromatic Fragrant Sweet Cherry                                 |
| Valeric Acid: iso Valeric Acid      | 141 | 503-74-2   | sour stinky feet sweaty cheese tropical Cheese, dairy, acidic, sour, pungent, fruity, stinky, ripe fatty and fruity notes | Sickening Sweaty Rancid Fecal (like manure)<br>Putrid foul            |
| Vanillin                            | 143 | 121-33-5   | sweet vanilla creamy chocolate creamy and phenolic                                                                        | Vanilla Sweet Chocolate Fragrant Aromatic                             |
